# Supplementary material for: Effect of surface energy and roughness on cell adhesion and growth – facile surface modification for enhanced cell culture
Source: PubMed Central journal article supplement — RSC Adv. 2021 Apr 26;11(25):15467–76. doi: 10.1039/d1ra02402g (PMC8698786; doi:10.1039/d1ra02402g), 2021-04-26
Supplement: RA-011-D1RA02402G-s001.pdf [file RA-011-D1RA02402G-s001.pdf]

## Effect of surface energy and roughness on cell adhesion and growth - facile surface modification for enhanced cell culture

B. Majhy, P. Priyadarshini, and A. K. Sen\*

Department of Mechanical Engineering, Indian Institute of Technology Madras, Chennai, India

\*Corresponding Author: ashis@iitm.ac.in

Table S1: The different parameters used for predicting the length of a particular cell for a given surface of certain surface energy and roughness. (all the parameters in Eqn. 1-5).

| Parameter | Value                    | Reference                                              |
|-----------|--------------------------|--------------------------------------------------------|
| $\rho_b$  | $0.015 \text{ \AA}^{-3}$ | Zhao <i>et al.</i> NMR Biomed. 2008<br>Feb21(2):159-64 |
| $\mu_r^0$ | $30 \text{ kJ.mol}^{-1}$ |                                                        |
| $\mu_b^0$ | $5 \text{ kJ.mol}^{-1}$  |                                                        |
| V         | $2600 \text{ \mu m}^3$   |                                                        |
| T         | 310 K                    |                                                        |
| $L_{co}$  | $17 \text{ \mu m}$       |                                                        |

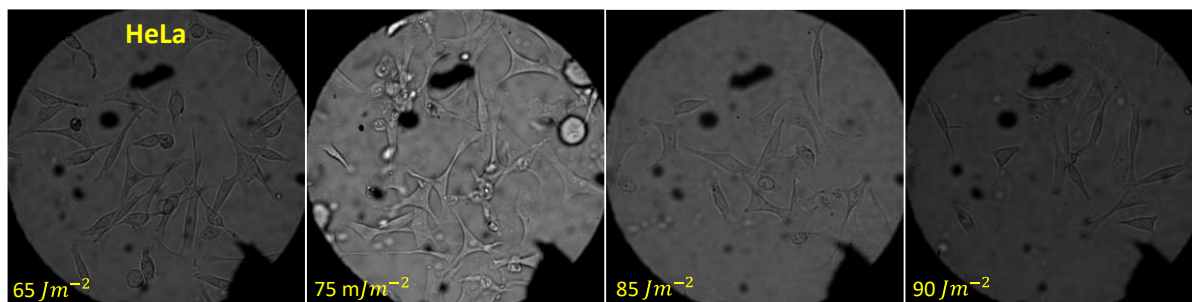

**Fig. S1** The experimental images of cell growth and proliferation on normal PDMS surface,  $\delta \approx 5 \text{ nm}$  or a roughness ratio,  $r = 1.05$ .

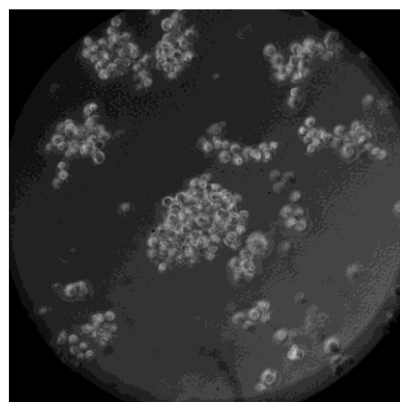

**Fig. S2** The experimental image of cell growth on extreme low surface energy surfaces such as the superhydrophobic surfaces of  $E_s \approx 21 \text{ mJ/m}^2$  and roughness ratio of  $r = 2.5$ .
